# Supplementary material for: Scalable extraction of pongamol from Pongamia pinnata for synthesis and application of colloidally stable iron nanoparticles
Source: Royal Society of Chemistry journal article supplement (doi:10.1039/d5ra04181c), 2025-01-01
Supplement: d5ra04181c1.pdf [file d5ra04181c1.pdf]

## Supporting Information

# Scalable extraction of pongamol from *Pongamia pinnata* for synthesis and application of colloiddally stable iron nanoparticles

Renjie Cui,<sup>a</sup> Mengying Wu,<sup>a</sup> Anna Galang,<sup>b</sup> Franklin Perez,<sup>a</sup> Vanessa Partridge Hing,<sup>a</sup> Nesha May Octavio Andoy,<sup>a</sup> Ruby May Arana Sullan,<sup>a,b\*</sup> Kris Sanghyun Kim<sup>a\*</sup>

<sup>a</sup>Department of Physical and Environmental Sciences, University of Toronto Scarborough, 1065

Military Trail, Toronto, ON M1C 1A4, Canada

<sup>b</sup>Department of Chemistry, University of Toronto, 80 St. George St., Toronto, ON M5S 3H6,

Canada

\*Corresponding author

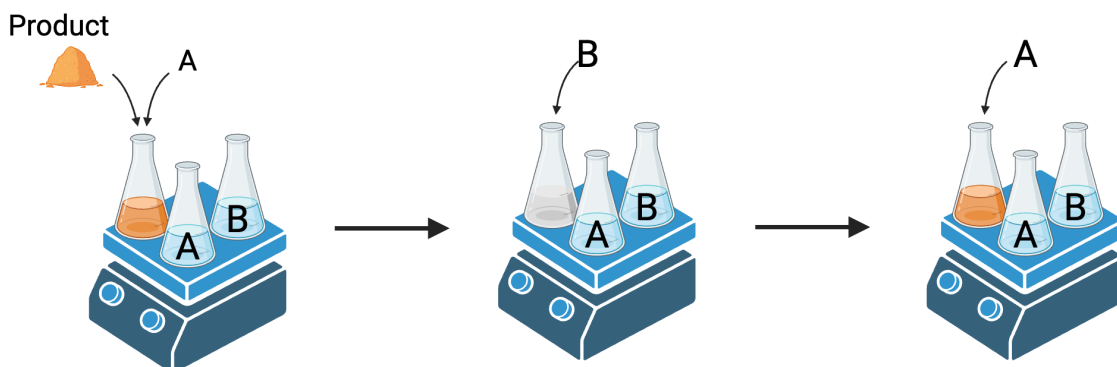

A: Solvent can dissolve the product  
 B: Solvent cannot dissolve the product

**Scheme S1.** Schematic depicting two-solvent recrystallization.

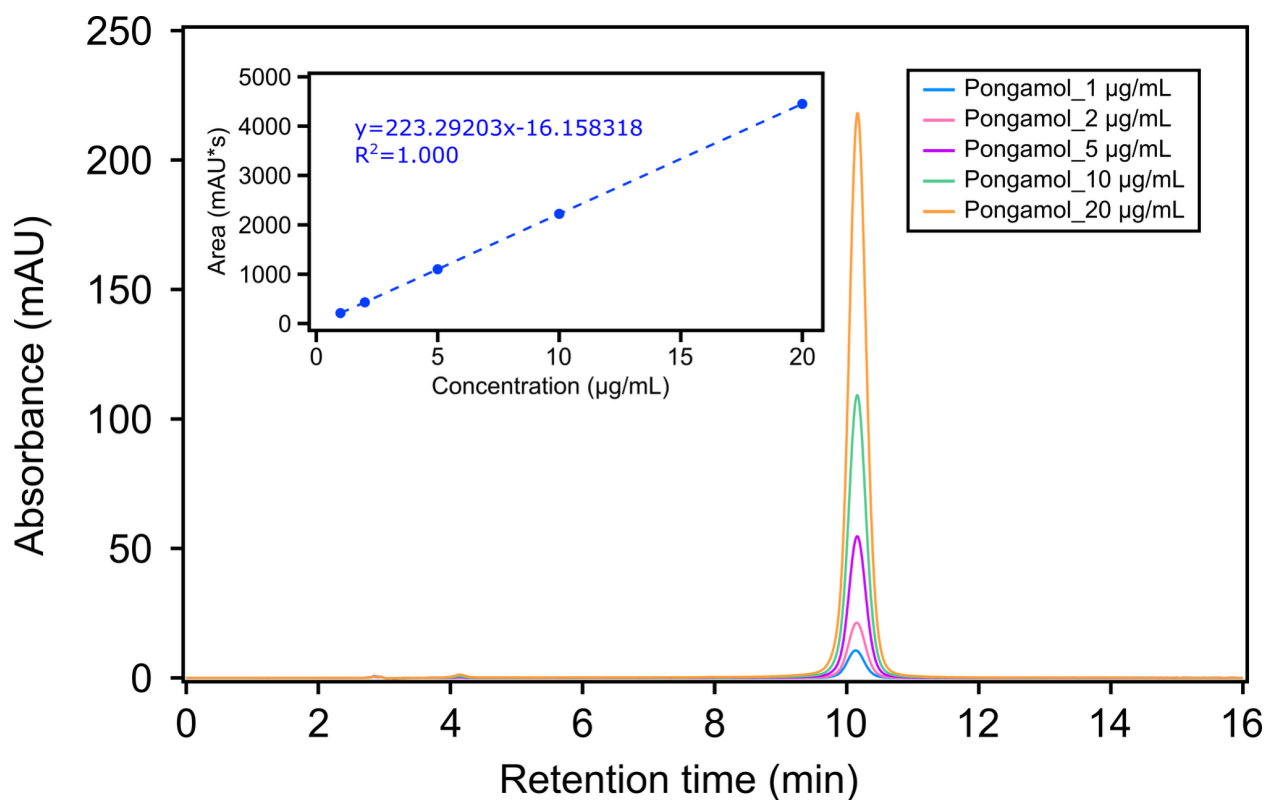

**Figure S1.** HPLC overlay chromatogram of pongamol at 350 nm. Insert: Calibration curve of pongamol based on a peak at retention time of 10 min with concentrations of 1 µg/mL, 2 µg/mL, 5 µg/mL, 10 µg/mL and 20 µg/mL.

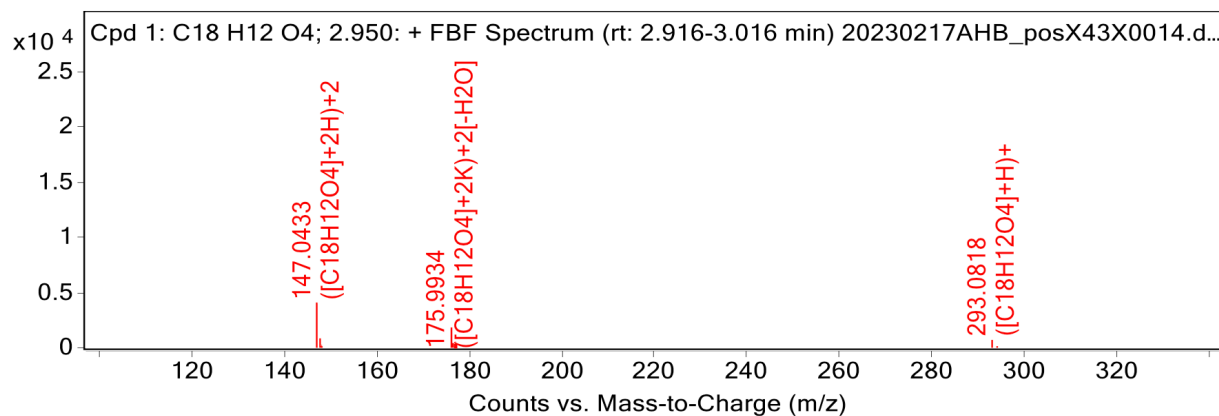

**Figure S2.** LCMS target compound screening report for Karanja.

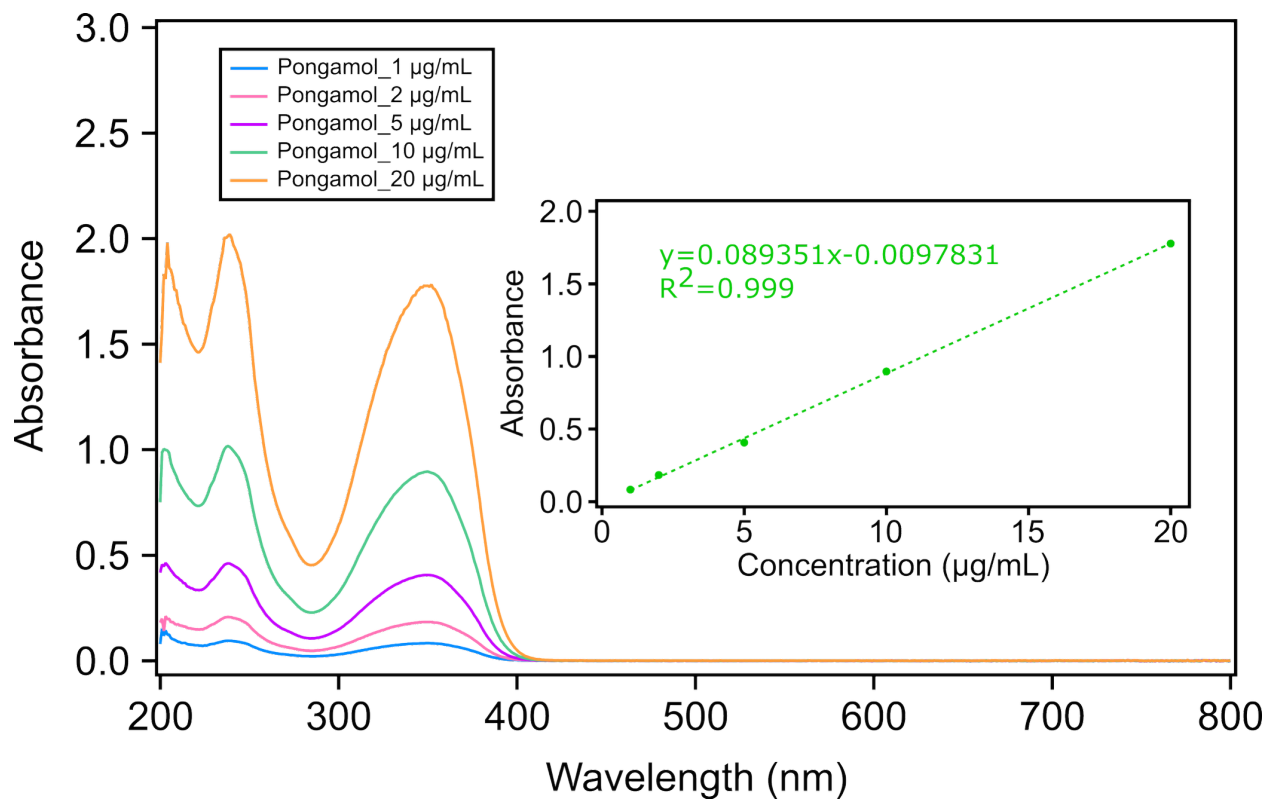

**Figure S3.** UV-Vis overlay spectrum of pongamol at wavelength from 200 nm to 800 nm. Insert: Calibration curve of pongamol at 350 nm with concentrations of 1 µg/mL, 2 µg/mL, 5 µg/mL, 10 µg/mL and 20 µg/mL.

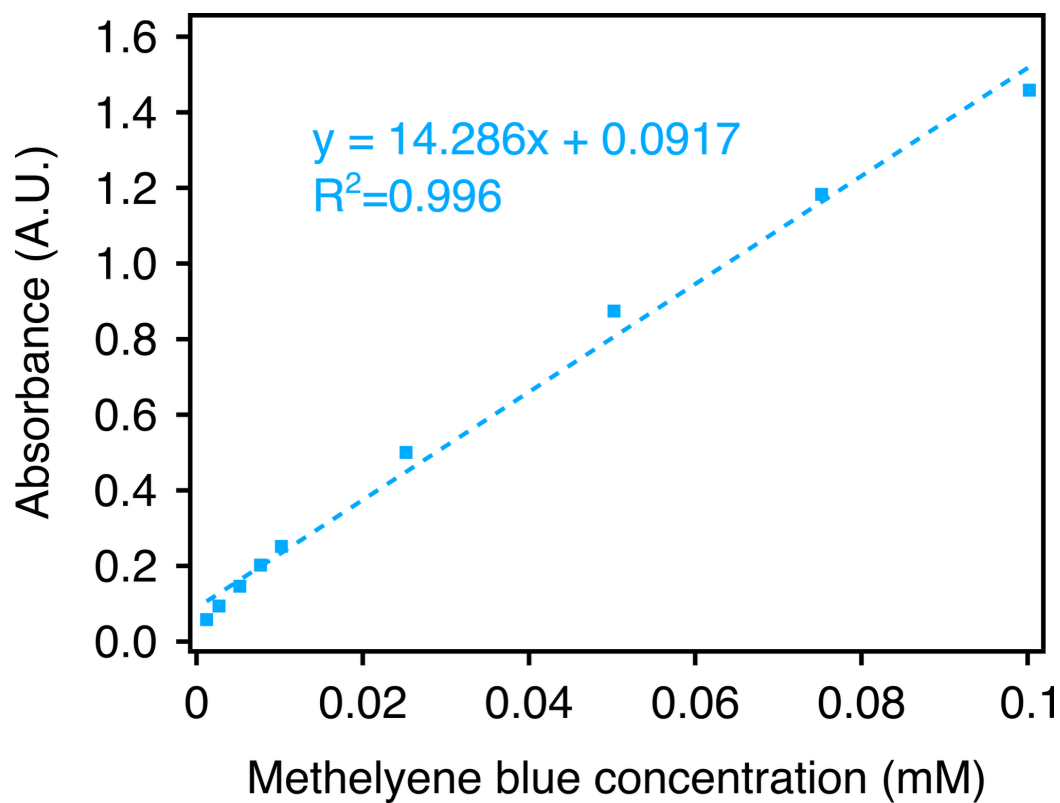

**Figure S4.** Calibration curve of methylene blue at 664 nm with concentrations of 0.1, 0.075, 0.05, 0.025, 0.01, 0.0075, 0.005, 0.0025, and 0.001 mM.

**Table S1.** HPLC result of the peaks with retention times at 4 min and 10 min analyzed at wavelengths of 300 nm and 350 nm

| Pongamol  | Area (mAU * s)          |                     |                          |                     |
|-----------|-------------------------|---------------------|--------------------------|---------------------|
|           | Retention time at 4 min |                     | Retention time at 10 min |                     |
|           | Wavelength<br>300nm     | Wavelength<br>350nm | Wavelength<br>300nm      | Wavelength<br>350nm |
| Extracted | 56                      | 18                  | 813                      | 2377                |
| Standard  | 46                      | 19                  | 792                      | 2280                |

**Table S2.** Quantitative HPLC peak area data of pongamol standards (1, 2, 5, 10 and 20 µg/mL) and pongamol extracted at pH 5.8, 6.2 and 6.9 at retention time around 10 min.

| Sample            | Peak area (at ~10 min) (mAU*s) |
|-------------------|--------------------------------|
| Standard 1 µg/mL  | 210.5                          |
| Standard 2 µg/mL  | 426.9                          |
| Standard 5 µg/mL  | 1098.8                         |
| Standard 10 µg/mL | 2219.0                         |
| Standard 20 µg/mL | 4449.1                         |
| pH 5.8            | 2318.0                         |
| pH 6.2            | 2135.7                         |
| pH 6.9            | 1754.2                         |

**Table S3.** Extraction efficiency of pongamol as a function of pH measured via HPLC.

| pH of crude pongamol        | Purity (%) |
|-----------------------------|------------|
| 5.8                         | > 97       |
| 6.2                         | 94         |
| 6.9                         | 78         |
| Reference acquired from TRC | 97.8       |

**Table S4.** <sup>1</sup>H NMR and <sup>13</sup>C NMR chemical shift assignment of pongamol with two structures.

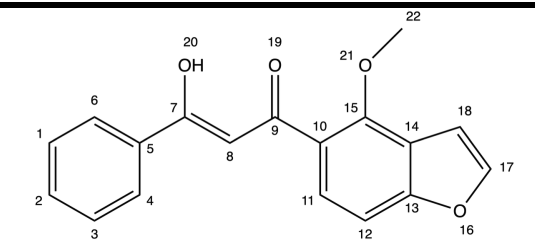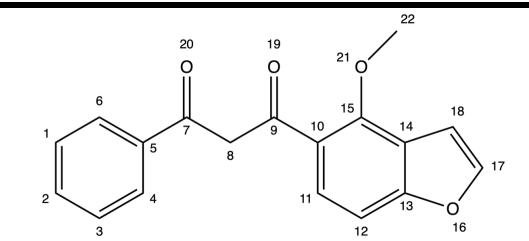

| Position | $\delta\text{H}$<br>(J in Hz) | $\delta\text{C}$ , type | $\delta\text{H}$<br>(J in Hz) | $\delta\text{C}$ , type |
|----------|-------------------------------|-------------------------|-------------------------------|-------------------------|
| 1        | 7.51, d (8.2, 6.6)            | 128.65, CH              | 7.51, d (8.2, 6.6)            | 128.65, CH              |
| 2        | 7.56, d (7.3)                 | 127.18, CH              | 7.56, d (7.3)                 | 132.20, CH              |
| 3        | 7.51, d (8.2, 6.6)            | 128.65, CH              | 7.51, d (8.2, 6.6)            | 128.65, CH              |
| 4        | 8.01, d (7.0)                 | 127.18, CH              | 8.01, d (7.0)                 | 128.75, CH              |
| 5        |                               | 133.37, C               |                               | 133.37, C               |
| 6        | 8.01, d (7.0)                 | 127.18, CH              | 8.01, d (7.0)                 | 128.75, CH              |
| 7        |                               | 184.01, C               |                               | 194.48, C               |
| 8        | 7.19, s                       | 97.96, CH               | 4.00, s                       | 54.28, CH <sub>2</sub>  |
| 9        |                               | 186.14, C               |                               | 194.97, C               |
| 10       |                               | 122.26, C               |                               | 122.26, C               |
| 11       | 7.90 / 7.94, d<br>(8.7 / 8.8) | 126.56/126.45<br>CH     | 7.90 / 7.94, d<br>(8.7 / 8.8) | 126.56/126.45<br>CH     |
| 12       | 7.34, dd (8.7)                | 107.10/106.87, CH       | 7.34, dd (8.7)                | 107.10/106.87, CH       |
| 13       |                               | 159.87/158.72, C        |                               | 159.87/158.72, C        |
| 14       |                               | 119.64/117.49, C        |                               | 119.64/117.49, C        |
| 15       |                               | 153.76, C               |                               | 154.64, C               |
| 16       |                               |                         |                               |                         |
| 17       | 7.66, d (2.3)                 | 144.80/144.95, CH       | 7.66, d (2.3)                 | 144.80/144.95, CH       |
| 18       | 7.03, d (1.4)                 | 105.24/105.32, CH       | 7.03, d (1.4)                 | 105.24/105.32, CH       |
| 19       |                               |                         |                               |                         |
| 20       | 16.93, s                      |                         |                               |                         |
| 21       |                               |                         |                               |                         |
| 22       | 4.17, s                       | 61.21, CH <sub>3</sub>  | 4.17, s                       | 61.21, CH <sub>3</sub>  |

**Table S5.** DLS measurement of FeNP synthesized with pongamol concentrations of 100 µg/mL, 250 µg/mL, 500 µg/mL, 750 µg/mL, 800 µg/mL, 900 µg/mL, 1000 µg/mL and 2000 µg/mL. Measurements were taken on the day when FeNPs were synthesized, after 7 days and 14 days.

| Pongamol Concentration (µg/mL) | Fresh (nm) | 7 days (nm) | 14 days (nm) |
|--------------------------------|------------|-------------|--------------|
| 100                            | 10.6 ± 0.3 | 7.9 ± 0.2   | 10.2 ± 0.2   |
| 250                            | 9.4 ± 0.1  | 10.0 ± 0.3  | 9.2 ± 0.3    |
| 500                            | 9.9 ± 0.4  | 8.5 ± 0.2   | 10.1 ± 0.1   |
| 750                            | 9.8 ± 0.1  | 10.0 ± 0.1  | 10.6 ± 0.2   |
| 800                            | 9.7 ± 0.2  | 9.8 ± 0.2   | 9.5 ± 0.5    |
| 900                            | 9.8 ± 0.2  | 9.3 ± 0.2   | 10.1 ± 0.3   |
| 1000                           | 9.9 ± 0.1  | 9.8 ± 0.2   | 7.9 ± 0.0    |
| 2000                           | 9.7 ± 0.1  | 8.6 ± 0.1   | 9.8 ± 0.4    |

**Table S6.** PALS measurement of FeNP synthesized with pongamol concentrations of 100 µg/mL, 250 µg/mL, 500 µg/mL, 750 µg/mL, 800 µg/mL, 900 µg/mL, 1000 µg/mL and 2000 µg/mL. Measurements were taken on the day when FeNPs were synthesized, after 7 days and 14 days.

| Pongamol Concentration (µg/mL) | Fresh (mV) | 7 days (mV) | 14 days (mV) |
|--------------------------------|------------|-------------|--------------|
| 100                            | 19 ± 2     | 20 ± 3      | 28 ± 7       |
| 250                            | 20 ± 8     | 29 ± 6      | 26 ± 1       |
| 500                            | 22 ± 6     | 30 ± 4      | 28 ± 13      |
| 750                            | 21 ± 8     | 51 ± 4      | 45 ± 1       |
| 800                            | 30 ± 4     | 23 ± 4      | 41 ± 22      |
| 900                            | 23 ± 6     | 24 ± 4      | 32 ± 6       |
| 1000                           | 23 ± 6     | 22 ± 2      | 28 ± 6       |
| 2000                           | 21 ± 5     | 24 ± 3      | 36 ± 3       |

**Table S7.** *P. defensor* growth parameter (lag phase, growth rate and maximum growth) were calculated based on the Gompertz fitting from parameter (a, b and c) from equation  $y = a \cdot \exp[-\exp(b - ct)]$

| FeNPs concentration<br>(mg/mL) | Lag phase<br>( $\lambda$ ) | Growth rate<br>( $\mu_m$ ) | Maximum growth<br>( $A$ ) |
|--------------------------------|----------------------------|----------------------------|---------------------------|
| 0 (Control)                    | $9.50 \pm 0.10$            | $0.108 \pm 0.005$          | $0.641 \pm 0.024$         |
| 0.01                           | $9.98 \pm 0.01$            | $0.113 \pm 0.003$          | $0.655 \pm 0.015$         |
| 0.1                            | $10.31 \pm 0.39$           | $0.108 \pm 0.010$          | $0.684 \pm 0.013$         |
